# Supplementary material for: GLP1R Gene Expression and Kidney Disease Progression
Source: PubMed Central journal article supplement (PMC11581634; doi:10.1001/jamanetworkopen.2024.40286), 2024-10-25
Supplement: jamanetwopen-e2440286-s001.pdf [file jamanetwopen-e2440286-s001.pdf]

## Supplementary Online Content

Triozzi JL, Yu Z, Giri A, et al; for the VA Million Veteran Program. *GLP1R* gene expression and kidney disease progression. *JAMA Netw Open*. 2024;7(10):e2440286.  
doi:10.1001/jamanetworkopen.2024.40286

**eTable 1.** Weights of Normalized Transcript per Million Values for Meta-Analysis of Single Nucleotide Polymorphism Effect Estimates Across All Tissues

**eTable 2.** Genetic Variants Associated With Systemic *GLP1R* Expression Used to Create the Genetic Risk Score

**eTable 3.** Definition of End-Stage Kidney Disease

**eTable 4.** Diagnosis Codes for Covariates

**eTable 5.** Survival Analysis of the *GLP1R* Genetic Risk Score Effect on Kidney Disease Progression, Including Stepwise Adjustments for Covariates and Subgroup Analyses

**eFigure 1.** Flowchart Detailing the Generation of a Systemic Genetic Instrument for *GLP1R* Expression From the Genotype-Tissue Expression Project

**eFigure 2.** Distribution of Genetic Risk Scores for Systemic *GLP1R* Expression Among Study Participants

**eFigure 3.** Linkage Disequilibrium Matrix for the Genetic Variants Associated With Systemic *GLP1R* Expression Used to Create the Genetic Risk Score

**eAppendix.** VA Million Veteran Program—Core Acknowledgement for Publications (February 2024)

This supplementary material has been provided by the authors to give readers additional information about their work.

**eTable 1. Weights of normalized transcript per million values for meta-analysis of single nucleotide polymorphism effect estimates across all tissues.**

| Tissue                                | TPM      |
|---------------------------------------|----------|
| Adipose Subcutaneous                  | 0.005347 |
| Adipose Visceral Omentum              | 0.004417 |
| Adrenal Gland                         | 0.00238  |
| Artery Aorta                          | 0        |
| Artery Coronary                       | 0.004562 |
| Artery Tibial                         | 0.010602 |
| Brain Amygdala                        | 0.001507 |
| Brain Anterior cingulate cortex BA24  | 0.004436 |
| Brain Caudate basal ganglia           | 0.038985 |
| Brain Cerebellar Hemisphere           | 0.003724 |
| Brain Cerebellum                      | 0.00421  |
| Brain Cortex                          | 0.00981  |
| Brain Frontal Cortex BA9              | 0.00401  |
| Brain Hippocampus                     | 0.003104 |
| Brain Hypothalamus                    | 0.029825 |
| Brain Nucleus accumbens basal ganglia | 0.021023 |
| Brain Putamen basal ganglia           | 0.018393 |
| Brain Spinal cord cervical c1         | 0.002074 |
| Brain Substantia nigra                | 0        |
| Breast Mammary Tissue                 | 0.010591 |
| Cells Cultured fibroblasts            | 0        |
| Cells EBV transformed lymphocytes     | 0        |
| Colon Sigmoid                         | 0.001191 |
| Colon Transverse                      | 0.002594 |
| Esophagus Gastroesophageal Junction   | 0.000986 |
| Esophagus Mucosa                      | 0.002147 |
| Esophagus Muscularis                  | 0        |
| Heart Atrial Appendage                | 0.132596 |

|                                 |          |
|---------------------------------|----------|
| Heart Left Ventricle            | 0.044741 |
| Kidney Cortex                   | 0.003166 |
| Liver                           | 0        |
| Lung                            | 0.024889 |
| Minor Salivary Gland            | 0.019252 |
| Muscle Skeletal                 | 0        |
| Nerve Tibial                    | 0.06929  |
| Ovary                           | 0        |
| Pancreas                        | 0.355041 |
| Pituitary                       | 0.002163 |
| Prostate                        | 0.007568 |
| Skin Not Sun Exposed Suprapubic | 0.01113  |
| Skin Sun Exposed Lower leg      | 0.016588 |
| Small Intestine Terminal Ileum  | 0.005497 |
| Spleen                          | 0.002499 |
| Stomach                         | 0.03184  |
| Testis                          | 0.058527 |
| Thyroid                         | 0.024682 |
| Uterus                          | 0.001873 |
| Vagina                          | 0.001368 |
| Whole Blood                     | 0.001372 |

Normalized TPM values were calculated by dividing the median TPM of each tissue by the sum of the median TPMs across all tissues, thus representing each tissue's proportional contribution to the total systemic effect (i.e., the sum across all tissues = 1.0).

Abbreviations: TPM—transcript per million.

**eTable 2. Genetic variants associated with systemic *GLP1R* expression used to create the genetic risk score.**

| Chr | Pos      | NEA | EA | TSS     | Beta     | SE       | <i>p</i> -value |
|-----|----------|-----|----|---------|----------|----------|-----------------|
| 6   | 39048860 | C   | T  | 62      | 0.152523 | 0.036477 | 2.90E-05        |
| 6   | 39073305 | A   | G  | 24507   | -0.29631 | 0.090058 | 0.001001        |
| 6   | 39011665 | G   | C  | -37133  | -0.18453 | 0.040686 | 5.75E-06        |
| 6   | 39264926 | G   | A  | 216128  | 0.284428 | 0.090481 | 0.001669        |
| 6   | 39128276 | G   | C  | 79478   | -0.25225 | 0.077073 | 0.001065        |
| 6   | 39051177 | G   | A  | 2379    | -0.28656 | 0.065503 | 1.22E-05        |
| 6   | 39808404 | A   | G  | 759606  | -0.08121 | 0.022217 | 0.000257        |
| 6   | 38237522 | C   | T  | -811276 | 0.226757 | 0.073015 | 0.001899        |
| 6   | 38363354 | T   | A  | -685444 | -0.3703  | 0.094072 | 8.27E-05        |
| 6   | 39615359 | T   | C  | 566561  | 0.1659   | 0.049471 | 0.000798        |
| 6   | 39327729 | G   | T  | 278931  | -0.12515 | 0.041186 | 0.002376        |
| 6   | 38927373 | G   | C  | -121425 | 0.083492 | 0.026902 | 0.001912        |
| 6   | 39381589 | G   | A  | 332791  | 0.119934 | 0.03203  | 0.000181        |
| 6   | 39591175 | A   | C  | 542377  | 0.085053 | 0.022002 | 0.000111        |
| 6   | 39397525 | T   | C  | 348727  | 0.172934 | 0.055966 | 0.002002        |

Abbreviations: Chr—chromosome; Pos—position; NEA—non-effect allele; EA—effect allele; TSS—transcription start site distance; Beta—effect size; SE—standard error.

**eTable 3. Definition of end-stage kidney disease.**

| Outcome                             | Definition                                                                                                                                                                                             |
|-------------------------------------|--------------------------------------------------------------------------------------------------------------------------------------------------------------------------------------------------------|
| eGFR < 15 ml/min/1.73m <sup>2</sup> | An outpatient laboratory measurement of eGFR < 15 mL/min/1.73 m <sup>2</sup> with confirmatory eGFR < 15 at least 3 months apart.                                                                      |
| Dialysis                            | Either 2 outpatient codes for dialysis or 1 outpatient and 1 inpatient diagnosis code dialysis in the primary position at least 3 months apart.                                                        |
| Transplant                          | Either an outpatient code for renal transplant or an inpatient code for renal transplant positioned as the primary diagnosis. In the outpatient setting two codes are required on two different dates. |

Abbreviations: eGFR—estimated glomerular filtration rate.

**eTable 4. Diagnosis codes for covariates.**

| <b>Dialysis</b> |                                                                                                                                                                                                                                                                                                                                                                                                                                                                                                                                                                                                                                                                                                                                                                                                                                                                |
|-----------------|----------------------------------------------------------------------------------------------------------------------------------------------------------------------------------------------------------------------------------------------------------------------------------------------------------------------------------------------------------------------------------------------------------------------------------------------------------------------------------------------------------------------------------------------------------------------------------------------------------------------------------------------------------------------------------------------------------------------------------------------------------------------------------------------------------------------------------------------------------------|
| ICD-9           | V45.1, V45.11, V56.0, V56.1, V56.2, V56.8, 585.6, V45.12, V56.31, V56.32, 792.5, 39.95, 39.952, 54.982, 39.953, 54.98, 54.983, 99.78                                                                                                                                                                                                                                                                                                                                                                                                                                                                                                                                                                                                                                                                                                                           |
| ICD-10          | N18.6 R88.0 Z49.31, Z49.32, Z91.15, 3E1M39Z Z49.01, Z49.02, Z99.2                                                                                                                                                                                                                                                                                                                                                                                                                                                                                                                                                                                                                                                                                                                                                                                              |
| ICD9P C         | 39.951, 54.981                                                                                                                                                                                                                                                                                                                                                                                                                                                                                                                                                                                                                                                                                                                                                                                                                                                 |
| CPT             | 90941, 90942, 90943, 90944, G0491, G0492, M0916, M0920, M0931, M0932, 90996, A4690, A4750, A4755, 90935, 90937, 90947, 90999, 90988, 90997, 4054F, 4055F, E1590, G8715, G8727, M0936, 36516, 36901, 36902, 36903, 36904, 36905, 36906, 36516, 36901, 36902, 36903, 36904, 36905, 36906, 36907, 36908, 36909, 4052F, 4053F, 90939, 90940, 90963, 90964, 90965, 90966, 90967, 90968, 90969, 90970, 90976, 90977, 90978, 90979, 90982, 90983, 90984, 90985, 90991, 90994, 99512, 99559, G0257, G0320, G0321, G0322, G0323, G0327, G8075, G8076, G8714, G8956, G9264, G9265, G9266, M0923, M0928, M0937, M0940, M0944, M0945, M0948, M0952, M0956, S9335, S9339, G9240, G9241, 0505F, 0507F, 9092, 90921, 90924, 90925, 90951, 90952, 90953, 90954, 90955, 90956, 90957, 90958, 90959, 90960, 90961, 90962, 90989, 90990, 90992, 90993, 90995, 90998, 4054F, 4055F |
| <b>Diabetes</b> |                                                                                                                                                                                                                                                                                                                                                                                                                                                                                                                                                                                                                                                                                                                                                                                                                                                                |
| ICD-9           | 250.1, 250.12, 250.21, 250.4, 250.41, 250.43, 250.5, 250.51, 250.6, 250.63, 250.72, 250.83, 250.93, 357.2, 362.03, 250, 250.22, 250.23, 250.3, 250.31, 250.53, 250.91, 362.01, 362.04, 362.06, 362.07, V53.91, 250.01, 250.03, 250.13, 250.2, 250.42, 250.52, 250.73, 250.82, 250.9, 250.92, 362.02, 362.05, 366.41, 250.11, 250.32, 250.33, 250.61, 250.62, 250.7, 250.71, 250.8, 250.81, V45.85 250.02                                                                                                                                                                                                                                                                                                                                                                                                                                                       |
| ICD-10          | E11.311, E10.42, E11.319, E11.628, E11.69, E10.618, E10.9, E10.37X3, E10.37X2, E10.11, E10.638, E11.3493, E11.8, E10.319, E11.3592, E11.3391, E10.69, E11.10, E10.29, E10.37X9, E11.9, E10.621, E11.3492, E09.36, E11.3399, E11.11, E11.3591, E11.3299, E10.620, E11.638, E09.42, E10.10, E10.65, E11.3499, E11.01, E11.630, E10.630, E08.36, E10.51, E11.649, E11.621, E11.620, E11.39, E10.21, E10.8, E11.65, E11.51, E10.40, Z46.81, E11.3393, E10.39, E13.42, E11.3593, E10.641, E10.311, E11.36, E11.3292, E10.649, E11.3491, E11.622, E11.3291, E11.618, E11.3599, E10.36, E11.00, E08.42, E13.36, Z96.41, E11.29, E11.3293, E10.628, E11.40, E13.10, E10.622, E11.641, E10.37X1, E11.42, E11.3392, E11.21                                                                                                                                               |

Abbreviations: ICD—International Classification of Diseases; CPT—Current Procedural Terminology.

**eTable 5. Survival analysis of the *GLP1R* genetic risk score effect on kidney disease progression, including stepwise adjustments for covariates and subgroup analyses.**

| <b>Overall</b>                         |        |       |               |                 |
|----------------------------------------|--------|-------|---------------|-----------------|
|                                        | N      | HR    | 95% CI        | <i>p</i> -value |
| Model 1                                | 353153 | 0.956 | 0.921 – 0.993 | <b>0.022</b>    |
| Model 2                                | 315815 | 0.958 | 0.922 – 0.995 | <b>0.028</b>    |
| Model 3                                | 315509 | 0.961 | 0.925 – 0.999 | <b>0.042</b>    |
| <b>Diabetes</b>                        |        |       |               |                 |
|                                        | N      | HR    | 95% CI        | <i>p</i> -value |
| Model 1                                | 90728  | 0.951 | 0.905 – 1.000 | 0.051           |
| Model 2                                | 86216  | 0.949 | 0.902 – 0.998 | <b>0.041</b>    |
| <b>No diabetes</b>                     |        |       |               |                 |
|                                        | N      | HR    | 95% CI        | <i>p</i> -value |
| Model 1                                | 262425 | 0.969 | 0.914 – 1.028 | 0.295           |
| Model 2                                | 229599 | 0.975 | 0.919 – 1.035 | 0.404           |
| <b>Overweight/obese</b>                |        |       |               |                 |
|                                        | N      | HR    | 95% CI        | <i>p</i> -value |
| Model 1                                | 284713 | 0.952 | 0.914 – 0.992 | <b>0.019</b>    |
| Model 2                                | 258729 | 0.957 | 0.918 – 0.997 | <b>0.037</b>    |
| <b>Normal weight</b>                   |        |       |               |                 |
|                                        | N      | HR    | 95% CI        | <i>p</i> -value |
| Model 1                                | 63482  | 0.985 | 0.887 – 1.094 | 0.777           |
| Model 2                                | 56780  | 0.969 | 0.871 – 1.078 | 0.560           |
| <b>Diabetes &amp; overweight/obese</b> |        |       |               |                 |
|                                        | N      | HR    | 95% CI        | <i>p</i> -value |
| Model 1                                | 82831  | 0.949 | 0.901 – 0.999 | <b>0.047</b>    |
| Model 2                                | 78914  | 0.947 | 0.899 – 0.998 | <b>0.044</b>    |
| <b>Diabetes &amp; normal weight</b>    |        |       |               |                 |
|                                        | N      | HR    | 95% CI        | <i>p</i> -value |
| Model 1                                | 7709   | 0.988 | 0.822 – 1.186 | 0.893           |
| Model 2                                | 7267   | 0.973 | 0.808 – 1.172 | 0.771           |

| <b>No diabetes &amp; overweight/obese</b> |        |       |               |         |
|-------------------------------------------|--------|-------|---------------|---------|
|                                           | N      | HR    | 95% CI        | p-value |
| Model 1                                   | 201882 | 0.963 | 0.901 – 1.028 | 0.258   |
| Model 2                                   | 179815 | 0.974 | 0.911 – 1.041 | 0.440   |
| <b>No diabetes &amp; normal weight</b>    |        |       |               |         |
|                                           | N      | HR    | 95% CI        | p-value |
| Model 1                                   | 55773  | 0.987 | 0.869 – 1.122 | 0.845   |
| Model 2                                   | 49513  | 0.975 | 0.856 – 1.110 | 0.698   |

The hazard ratio for kidney disease progression represents the top tertile versus the bottom tertile of the genetic risk score for systemic *GLP1R* expression. Model 1 is unadjusted. Model 2 is adjusted for age, sex, the first 10 principal components, systolic blood pressure, and the use of an ACE or ARB. Model 3 is Model 2 plus adjustments for body mass index and the presence or absence of diabetes.



**eFigure 1. Flowchart detailing the generation of a systemic genetic instrument for GLP1R expression from the Genotype-Tissue Expression Project.**

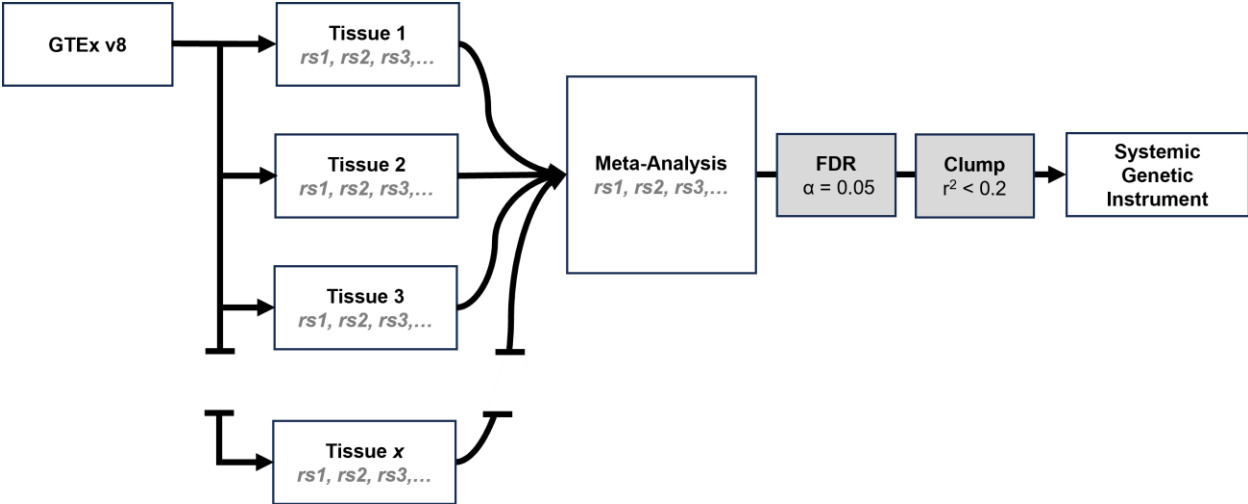

Abbreviations: GTEX v8—The Genotype-Tissue Expression project version 8; FDR—false discovery rate.

**eFigure 2. Distribution of genetic risk scores for systemic *GLP1R* expression among study participants.**

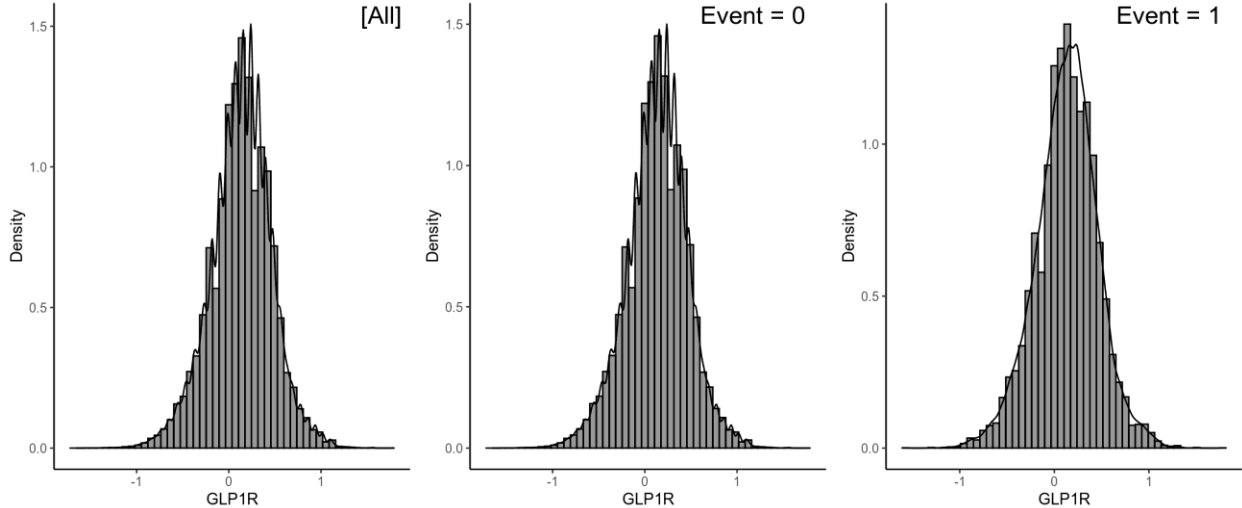

Event corresponds to kidney disease progression, defined as the incident decline in eGFR of 40% or end-stage kidney disease during the follow-up period.

**eFigure 3. Linkage disequilibrium matrix for the genetic variants associated with systemic *GLP1R* expression used to create the genetic risk score.**

| RSID        | rs16890468 | rs180699747 | rs6933584 | rs10484850 | rs10305420 | rs13219169 | rs10305476 | rs116018552 | rs115530377 | rs60567936 | rs716952 | rs80022279 | rs7744341 | rs2045577 | rs13220608 |
|-------------|------------|-------------|-----------|------------|------------|------------|------------|-------------|-------------|------------|----------|------------|-----------|-----------|------------|
| rs16890468  | 1          | 0           | 0.004     | 0          | 0          | 0.001      | 0          | 0.001       | 0.001       | 0.001      | 0        | 0          | 0.003     | 0         | 0.004      |
| rs180699747 | 0          | 1           | 0         | 0.001      | 0.002      | 0.001      | 0          | 0           | 0           | 0          | 0        | 0.001      | 0.004     | 0.001     | 0.001      |
| rs6933584   | 0.004      | 0           | 1         | 0.067      | 0.044      | 0.018      | 0.005      | 0           | 0           | 0.01       | 0.001    | 0.002      | 0         | 0         | 0.006      |
| rs10484850  | 0          | 0.001       | 0.067     | 1          | 0.16       | 0.082      | 0.013      | 0.006       | 0.001       | 0.002      | 0.003    | 0.001      | 0         | 0         | 0          |
| rs10305420  | 0          | 0.002       | 0.044     | 0.16       | 1          | 0.03       | 0.007      | 0           | 0           | 0          | 0.001    | 0          | 0.005     | 0.005     | 0.003      |
| rs13219169  | 0.001      | 0.001       | 0.018     | 0.082      | 0.03       | 1          | 0          | 0.082       | 0.001       | 0.014      | 0        | 0.001      | 0.001     | 0         | 0          |
| rs10305476  | 0          | 0           | 0.005     | 0.013      | 0.007      | 0          | 1          | 0           | 0.001       | 0          | 0        | 0.001      | 0.009     | 0.003     | 0          |
| rs116018552 | 0.001      | 0           | 0         | 0.006      | 0          | 0.082      | 0          | 1           | 0.001       | 0.002      | 0.001    | 0.001      | 0.001     | 0.003     | 0.002      |
| rs115530377 | 0.001      | 0           | 0         | 0.001      | 0          | 0.001      | 0.001      | 0.001       | 1           | 0          | 0.002    | 0          | 0.005     | 0         | 0          |
| rs60567936  | 0.001      | 0           | 0.01      | 0.002      | 0          | 0.014      | 0          | 0.002       | 0           | 1          | 0.001    | 0          | 0         | 0         | 0.003      |
| rs716952    | 0          | 0           | 0.001     | 0.003      | 0.001      | 0          | 0          | 0.001       | 0.002       | 0.001      | 1        | 0.133      | 0         | 0         | 0.002      |
| rs80022279  | 0          | 0.001       | 0.002     | 0.001      | 0          | 0.001      | 0.001      | 0.001       | 0           | 0          | 0.133    | 1          | 0.013     | 0.076     | 0.005      |
| rs7744341   | 0.003      | 0.004       | 0         | 0          | 0.005      | 0.001      | 0.009      | 0.001       | 0.005       | 0          | 0        | 0.013      | 1         | 0.173     | 0.046      |
| rs2045577   | 0          | 0.001       | 0         | 0          | 0.005      | 0          | 0.003      | 0.003       | 0           | 0          | 0        | 0.076      | 0.173     | 1         | 0.01       |
| rs13220608  | 0.004      | 0.001       | 0.006     | 0          | 0.003      | 0          | 0          | 0.002       | 0           | 0.003      | 0.002    | 0.005      | 0.046     | 0.01      | 1          |

The plot illustrates pairwise linkage disequilibrium between the genetic variants associated with systemic *GLP1R* expression based on the European reference population. These were generated using the National Institutes of Health LDlink. The colors correspond to  $R^2$  values, where white indicates no correlation and red indicates absolute correlation.

## **eAppendix. VA Million Veteran Program: Core Acknowledgement for Publications (February 2024).**

### **MVP Program Office**

Sumitra Muralidhar, Ph.D., Program Director

US Department of Veterans Affairs, 810 Vermont Avenue NW, Washington, DC 20420

Jennifer Moser, Ph.D., Associate Director, Scientific Programs

US Department of Veterans Affairs, 810 Vermont Avenue NW, Washington, DC 20420

Jennifer E. Deen, B.S., Associate Director, Cohort & Public Relations

US Department of Veterans Affairs, 810 Vermont Avenue NW, Washington, DC 20420

### **MVP Executive Committee**

Co-Chair: Philip S. Tsao, Ph.D.

VA Palo Alto Health Care System, 3801 Miranda Avenue, Palo Alto, CA 94304

Co-Chair: Sumitra Muralidhar, Ph.D.

US Department of Veterans Affairs, 810 Vermont Avenue NW, Washington, DC 20420

J. Michael Gaziano, M.D., M.P.H.

VA Boston Healthcare System, 150 S. Huntington Avenue, Boston, MA 02130

Elizabeth Hauser, Ph.D.

Durham VA Medical Center, 508 Fulton Street, Durham, NC 27705

Amy Kilbourne, Ph.D., M.P.H.

VA HSR&D, 2215 Fuller Road, Ann Arbor, MI 48105

Michael Matheny, M.D., M.S., M.P.H.

VA Tennessee Valley Healthcare System, 1310 24<sup>th</sup> Ave. South, Nashville, TN 37212

Dave Oslin, M.D.

Philadelphia VA Medical Center, 3900 Woodland Avenue, Philadelphia, PA 19104

### **MVP Co-Principal Investigators**

J. Michael Gaziano, M.D., M.P.H.

VA Boston Healthcare System, 150 S. Huntington Avenue, Boston, MA 02130

Philip S. Tsao, Ph.D.

VA Palo Alto Health Care System, 3801 Miranda Avenue, Palo Alto, CA 94304

### **MVP Core Operations**

Jessica V. Brewer, M.P.H., Director, MVP Recruitment & Enrollment

VA Boston Healthcare System, 150 S. Huntington Avenue, Boston, MA 02130

Mary T. Brophy M.D., M.P.H., Director, VA Central Biorepository

VA Boston Healthcare System, 150 S. Huntington Avenue, Boston, MA 02130

Kelly Cho, M.P.H, Ph.D., Director, MVP Phenomics Data Core

VA Boston Healthcare System, 150 S. Huntington Avenue, Boston, MA 02130

Lori Churby, B.S., Director, MVP Regulatory Affairs

VA Palo Alto Health Care System, 3801 Miranda Avenue, Palo Alto, CA 94304

Scott L. DuVall, Ph.D., Director, VA Informatics and Computing Infrastructure (VINCI)

VA Salt Lake City Health Care System, 500 Foothill Drive, Salt Lake City, UT 84148

Saiju Pyarajan Ph.D., Director, Data and Computational Sciences

VA Boston Healthcare System, 150 S. Huntington Avenue, Boston, MA 02130

Luis E. Selva, Ph.D., Executive Director, MVP Biorepositories  
VA Boston Healthcare System, 150 S. Huntington Avenue, Boston, MA 02130  
Shahpoor (Alex) Shayan, M.S., Director, MVP Recruitment and Enrollment Informatics  
VA Boston Healthcare System, 150 S. Huntington Avenue, Boston, MA 02130  
Stacey B. Whitbourne, Ph.D., Director, MVP Cohort Management  
VA Boston Healthcare System, 150 S. Huntington Avenue, Boston, MA 02130  
MVP Coordinating Centers  
MVP Coordinating Center, Boston - J. Michael Gaziano, M.D., M.P.H.  
VA Boston Healthcare System, 150 S. Huntington Avenue, Boston, MA 02130  
MVP Coordinating Center, Palo Alto – Philip S. Tsao, Ph.D.  
VA Palo Alto Health Care System, 3801 Miranda Avenue, Palo Alto, CA 94304  
MVP Information Center, Canandaigua – Brady Stephens, M.S.  
Canandaigua VA Medical Center, 400 Fort Hill Avenue, Canandaigua, NY 14424  
Cooperative Studies Program Clinical Research Pharmacy Coordinating Center,  
Albuquerque – Todd Connor, Pharm.D.; Dean P. Argyres, B.S., M.S.  
New Mexico VA Health Care System, 1501 San Pedro Drive SE, Albuquerque, NM  
87108

#### **MVP Publications and Presentations Committee**

Co-Chair: Themistocles L. Assimes, M.D., Ph. D  
VA Palo Alto Health Care System, 3801 Miranda Avenue, Palo Alto, CA 94304  
Co-Chair: Adriana Hung, M.D.; M.P.H  
VA Tennessee Valley Healthcare System, 1310 24<sup>th</sup> Ave. South, Nashville, TN 37212  
Co-Chair: Henry Kranzler, M.D.  
Philadelphia VA Medical Center, 3900 Woodland Avenue, Philadelphia, PA 19104

#### **MVP Local Site Investigators**

Samuel Aguayo, M.D., Phoenix VA Health Care System  
650 E. Indian School Road, Phoenix, AZ 85012  
Sunil Ahuja, M.D., South Texas Veterans Health Care System  
7400 Merton Minter Boulevard, San Antonio, TX 78229  
Kathrina Alexander, M.D., Veterans Health Care System of the Ozarks  
1100 North College Avenue, Fayetteville, AR 72703  
Xiao M. Androulakis, M.D., Columbia VA Health Care System  
6439 Garners Ferry Road, Columbia, SC 29209  
Prakash Balasubramanian, M.D., William S. Middleton Memorial Veterans Hospital  
2500 Overlook Terrace, Madison, WI 53705  
Zuhair Ballas, M.D., Iowa City VA Health Care System  
601 Highway 6 West, Iowa City, IA 52246-2208  
Elizabeth S. Bast, M.D., M.P.H., Miami VA Health Care System  
1201 NW 16th Street, 11 GRC, Miami FL 33125  
Jean Beckham, Ph.D., Durham VA Medical Center  
508 Fulton Street, Durham, NC 27705  
Sujata Bhushan, M.D., VA North Texas Health Care System  
4500 S. Lancaster Road, Dallas, TX 75216  
Edward Boyko, M.D., VA Puget Sound Health Care System

1660 S. Columbian Way, Seattle, WA 98108-1597  
David Cohen, M.D., Portland VA Medical Center  
3710 SW U.S. Veterans Hospital Road, Portland, OR 97239  
Louis Dellitalia, M.D., Birmingham VA Medical Center  
700 S. 19th Street, Birmingham AL 35233  
Gerald Wayne Dryden, Jr., M.D., Ph.D., Louisville VA Medical Center  
800 Zorn Avenue, Louisville, KY 40206  
L. Christine Faulk, M.D., Robert J. Dole VA Medical Center  
5500 East Kellogg Drive, Wichita, KS 67218-1607  
Joseph Fayad, M.D., VA Southern Nevada Healthcare System  
6900 North Pecos Road, North Las Vegas, NV 89086  
Daryl Fujii, Ph.D., VA Pacific Islands Health Care System  
459 Patterson Rd, Honolulu, HI 96819  
Saib Gappy, M.D., John D. Dingell VA Medical Center  
4646 John R Street, Detroit, MI 48201  
Frank Gesek, Ph.D., White River Junction VA Medical Center  
163 Veterans Drive, White River Junction, VT 05009  
Michael Godschalk, M.D., Richmond VA Medical Center  
1201 Broad Rock Blvd., Richmond, VA 23249  
Jennifer Greco, M.D., Sioux Falls VA Health Care System  
2501 W 22nd Street, Sioux Falls, SD 57105  
Todd W. Gress, M.D., Ph.D., Hershel "Woody" Williams VA Medical Center  
1540 Spring Valley Drive, Huntington, WV 25704  
Samir Gupta, M.D., M.S.C.S., VA San Diego Healthcare System  
3350 La Jolla Village Drive, San Diego, CA 92161  
Salvador Gutierrez, M.D., Edward Hines, Jr. VA Medical Center  
5000 South 5th Avenue, Hines, IL 60141  
Mark Hamner, M.D., Ralph H. Johnson VA Medical Center  
109 Bee Street, Mental Health Research, Charleston, SC 29401  
John Harley, M.D., Ph.D., Cincinnati VA Medical Center  
3200 Vine Street, Cincinnati, OH 45220  
Daniel J. Hogan, M.D., Bay Pines VA Healthcare System  
10,000 Bay Pines Blvd Bay Pines, FL 33744  
Adriana Hung, M.D., M.P.H., VA Tennessee Valley Healthcare System  
1310 24th Avenue, South Nashville, TN 37212  
Robin Hurley, M.D., W.G. (Bill) Hefner VA Medical Center  
1601 Brenner Ave, Salisbury, NC 28144  
Pran Iruvanti, D.O., Ph.D., Hampton VA Medical Center  
100 Emancipation Drive, Hampton, VA 23667  
Frank Jacono, M.D., VA Northeast Ohio Healthcare System  
10701 East Boulevard, Cleveland, OH 44106  
Darshana Jhala, M.D., Philadelphia VA Medical Center  
3900 Woodland Avenue, Philadelphia, PA 19104  
Seema Joshi, M.D., F.A.C.P., ABOIM; VA Eastern Kansas Health Care System  
4101 S 4th Street Trafficway, Leavenworth, KS 66048  
Scott Kinlay, M.B.B.S., Ph.D., VA Boston Healthcare System

150 S. Huntington Avenue, Boston, MA 02130  
Michael Landry, Ph.D., Southeast Louisiana Veterans Health Care System  
2400 Canal Street, New Orleans, LA 70119  
Peter Liang, M.D., M.P.H., VA New York Harbor Healthcare System  
423 East 23rd Street, New York, NY 10010  
Suthat Liangpunsakul, M.D., M.P.H., Richard Roudebush VA Medical Center  
1481 West 10th Street, Indianapolis, IN 46202  
Jack Lichy, M.D., Ph.D., Washington DC VA Medical Center  
50 Irving St, Washington, D. C. 20422  
Tze Shien Lo, M.D., Fargo VA Health Care System  
2101 N. Elm, Fargo, ND 58102  
C. Scott Mahan, M.D., Charles George VA Medical Center  
1100 Tunnel Road, Asheville, NC 28805  
Ronnie Marrache, M.D., VA Maine Healthcare System Center, Augusta, ME 04330  
Stephen Mastorides, M.D., James A. Haley Veterans' Hospital  
13000 Bruce B. Downs Blvd, Tampa, FL 33612  
Kristin Mattocks, Ph.D., M.P.H., Central Western Massachusetts Healthcare System  
421 North Main Street, Leeds, MA 01053  
Paul Meyer, M.D., Ph.D., Southern Arizona VA Health Care System  
3601 S 6th Avenue, Tucson, AZ 85723  
Jonathan Moorman, M.D., Ph.D., James H. Quillen VA Medical Center  
Corner of Lamont & Veterans Way, Mountain Home, TN 37684  
Providencia Morales, R.N., Northern Arizona VA Health Care System  
500 Highway 89 North, Prescott, AZ 86313  
Timothy Morgan, M.D., VA Long Beach Healthcare System  
5901 East 7th Street Long Beach, CA 90822  
Maureen Murdoch, M.D., M.P.H., Minneapolis VA Health Care System  
One Veterans Drive, Minneapolis, MN 55417  
Eknath Naik, M.D., Ph.D., West Palm Beach VA Medical Center,  
7305 North Military Trail, West Palm Beach, FL 33410-6400  
James Norton, Ph.D., VA Health Care Upstate New York  
113 Holland Avenue, Albany, NY 12208  
Olaoluwa Okusaga, M.D., Michael E. DeBakey VA Medical Center  
2002 Holcombe Blvd, Houston, TX 77030  
Michael K. Ong, M.D., VA Greater Los Angeles Health Care System  
11301 Wilshire Blvd, Los Angeles, CA 90073  
Kris Ann Oursler, M.D., Salem VA Medical Center  
1970 Roanoke Blvd, Salem, VA 24153  
Ismene Petrakis, M.D., VA Connecticut Healthcare System  
950 Campbell Avenue, West Haven, CT 06516  
Samuel Poon, M.D., Manchester VA Medical Center  
718 Smyth Road, Manchester, NH 03104  
Amneet S. Rai, Pharm.D., VA Sierra Nevada Health Care System  
975 Kirman Avenue, Reno, NV 89502  
Michael Rauchman, M.D., St. Louis VA Health Care System  
915 North Grand Blvd, St. Louis, MO 63106

Richard Servatius, Ph.D., Syracuse VA Medical Center  
800 Irving Avenue, Syracuse, NY 13210

Satish Sharma, M.D., Providence VA Medical Center  
830 Chalkstone Avenue, Providence, RI 02908

River Smith, Ph.D., Eastern Oklahoma VA Health Care System  
1011 Honor Heights Drive, Muskogee, OK 74401

Peruvemba Sriram, M.D., N. FL/S. GA Veterans Health System  
1601 SW Archer Road, Gainesville, FL 32608

Patrick Strollo, Jr., M.D., VA Pittsburgh Health Care System  
University Drive, Pittsburgh, PA 15240

Neeraj Tandon, M.D., Overton Brooks VA Medical Center  
510 East Stoner Ave, Shreveport, LA 71101

Philip Tsao, Ph.D., VA Palo Alto Health Care System  
3801 Miranda Avenue, Palo Alto, CA 94304-1290

Gerardo Villareal, M.D., New Mexico VA Health Care System  
1501 San Pedro Drive, S.E. Albuquerque, NM 87108

Jessica Walsh, M.D., VA Salt Lake City Health Care System  
500 Foothill Drive, Salt Lake City, UT 84148

John Wells, Ph.D., Edith Nourse Rogers Memorial Veterans Hospital  
200 Springs Road, Bedford, MA 01730

Jeffrey Whittle, M.D., M.P.H., Clement J. Zablocki VA Medical Center  
5000 West National Avenue, Milwaukee, WI 53295

Mary Whooley, M.D., San Francisco VA Health Care System  
4150 Clement Street, San Francisco, CA 94121

Peter Wilson, M.D., Atlanta VA Medical Center  
1670 Clairmont Road, Decatur, GA 30033

Junzhe Xu, M.D., VA Western New York Healthcare System  
3495 Bailey Avenue, Buffalo, NY 14215-1199

Shing Shing Yeh, Ph.D., M.D., Northport VA Medical Center  
79 Middleville Road, Northport, NY 11768

Andrew W. Yen, M.D., VA Northern California Health Care System  
10535 Hospital Way, Mather, CA 95655
