# Supplementary material for: GLP1R Gene Expression and Kidney Disease Progression
Source: PubMed Central journal article supplement (PMC11581634; doi:10.1001/jamanetworkopen.2024.40286), 2024-10-25
Supplement: jamanetwopen-e2440286-s002.pdf [file jamanetwopen-e2440286-s002.pdf]

| <b>*Group Name(s): VA Million Veteran Program</b> |                   |                              |                         |                                       |                                                 |                                                                |                                                                                                                 |  |  |  |  |  |  |  |  |  |  |  |  |  |
|---------------------------------------------------|-------------------|------------------------------|-------------------------|---------------------------------------|-------------------------------------------------|----------------------------------------------------------------|-----------------------------------------------------------------------------------------------------------------|--|--|--|--|--|--|--|--|--|--|--|--|--|
| <b>*First Name and Middle Initial(s)</b>          | <b>*Last Name</b> | <b>*Suffix (eg, Jr, III)</b> | <b>Academic Degrees</b> | <b>Institution</b>                    | <b>Location (city, state/province, country)</b> | <b>Role or Contribution, eg, chair, principal investigator</b> | <b>Group (if more than 1 Group listed in the byline and/or Subgroup (eg, Steering Committee))</b>               |  |  |  |  |  |  |  |  |  |  |  |  |  |
| Sumitra                                           | Muralidhar        |                              | Ph.D.                   | US Department of Veterans Affairs     | Washington, DC, USA                             | Program Director; Co-                                          | MVP Program Office; MVP Executive Committee                                                                     |  |  |  |  |  |  |  |  |  |  |  |  |  |
| Jennifer                                          | Moser             |                              | Ph.D.                   | US Department of Veterans Affairs     | Washington, DC, USA                             | Associate Director, Sci                                        | MVP Program Office                                                                                              |  |  |  |  |  |  |  |  |  |  |  |  |  |
| Jennifer E.                                       | Deen              |                              | B.S.                    | US Department of Veterans Affairs     | Washington, DC, USA                             | Associate Director, Col                                        | MVP Program Office                                                                                              |  |  |  |  |  |  |  |  |  |  |  |  |  |
| Philip S.                                         | Tsao              |                              | Ph.D.                   | VA Palo Alto Health Care System       | Palo Alto, CA, USA                              | Co-Principal Investigat                                        | MVP Co-Principal Investigators; MVP Executive Committee; MVP Coordinating Centers; MVP Local Site Investigators |  |  |  |  |  |  |  |  |  |  |  |  |  |
| J. Michael                                        | Gaziano           |                              | M.D., M.P.              | VA Boston Healthcare System           | Boston, MA, USA                                 | Co-Principal Investigat                                        | MVP Co-Principal Investigators; MVP Executive Committee; MVP Coordinating Centers                               |  |  |  |  |  |  |  |  |  |  |  |  |  |
| Elizabeth                                         | Hauser            |                              | Ph.D.                   | Durham VA Medical Center              | Durham, NC, USA                                 | MVP Executive                                                  | MVP Executive Committee                                                                                         |  |  |  |  |  |  |  |  |  |  |  |  |  |
| Amy                                               | Kilbourne         |                              | Ph.D., M.P.             | VA HSR&D                              | Ann Arbor, MI, USA                              | MVP Executive                                                  | MVP Executive Committee                                                                                         |  |  |  |  |  |  |  |  |  |  |  |  |  |
| Michael                                           | Matheny           |                              | M.D., M.S.              | VA Tennessee Valley Healthcare Syst   | Nashville, TN, USA                              | MVP Executive                                                  | MVP Executive Committee                                                                                         |  |  |  |  |  |  |  |  |  |  |  |  |  |
| Dave                                              | Oslin             |                              | M.D.                    | Philadelphia VA Medical Center        | Philadelphia, PA, USA                           | MVP Executive                                                  | MVP Executive Committee                                                                                         |  |  |  |  |  |  |  |  |  |  |  |  |  |
| Lori                                              | Churby            |                              | B.S.                    | VA Palo Alto Health Care System       | Palo Alto, CA, USA                              | Director, MVP Regulat                                          | MVP Core Operations                                                                                             |  |  |  |  |  |  |  |  |  |  |  |  |  |
| Stacey B.                                         | Whitbourne        |                              | Ph.D.                   | VA Boston Healthcare System           | Boston, MA, USA                                 | Director, MVP Cohort                                           | MVP Core Operations                                                                                             |  |  |  |  |  |  |  |  |  |  |  |  |  |
| Jessica V.                                        | Brewer            |                              | M.P.H.                  | VA Boston Healthcare System           | Boston, MA, USA                                 | Director, MVP Recruit                                          | MVP Core Operations                                                                                             |  |  |  |  |  |  |  |  |  |  |  |  |  |
| Shahpoor (Alex)                                   | Shayan            |                              | M.S.                    | VA Boston Healthcare System           | Boston, MA, USA                                 | Director, MVP Recruit                                          | MVP Core Operations                                                                                             |  |  |  |  |  |  |  |  |  |  |  |  |  |
| Luis E.                                           | Selva             |                              | Ph.D.                   | VA Boston Healthcare System           | Boston, MA, USA                                 | Executive Director, MV                                         | MVP Core Operations                                                                                             |  |  |  |  |  |  |  |  |  |  |  |  |  |
| Saiju                                             | Pyarajan          |                              | Ph.D.                   | VA Boston Healthcare System           | Boston, MA, USA                                 | Director, Data and Con                                         | MVP Core Operations                                                                                             |  |  |  |  |  |  |  |  |  |  |  |  |  |
| Kelly                                             | Cho               |                              | M.P.H, Ph.D.            | VA Boston Healthcare System           | Boston, MA, USA                                 | Director, MVP Phenom                                           | MVP Core Operations                                                                                             |  |  |  |  |  |  |  |  |  |  |  |  |  |
| Scott L.                                          | DuVall            |                              | Ph.D.                   | VA Salt Lake City Health Care System  | Salt Lake City, UT, USA                         | Director, VA Informati                                         | MVP Core Operations                                                                                             |  |  |  |  |  |  |  |  |  |  |  |  |  |
| Mary T.                                           | Brophy            |                              | M.D., M.P.              | VA Boston Healthcare System           | Boston, MA, USA                                 | Director, VA Central Bi                                        | MVP Core Operations                                                                                             |  |  |  |  |  |  |  |  |  |  |  |  |  |
| Brady                                             | Stephens          |                              | M.S.                    | Canandaigua VA Medical Center         | Canandaigua, NY, USA                            | MVP Information Cent                                           | MVP Coordinating Centers                                                                                        |  |  |  |  |  |  |  |  |  |  |  |  |  |
| Todd                                              | Connor            |                              | Pharm.D.                | New Mexico VA Health Care System      | Albuquerque, NM, USA                            | CSP Clinical Research F                                        | MVP Coordinating Centers; Cooperative Studies Program                                                           |  |  |  |  |  |  |  |  |  |  |  |  |  |
| Dean P.                                           | Argyres           |                              | B.S., M.S.              | New Mexico VA Health Care System      | Albuquerque, NM, USA                            | CSP Clinical Research F                                        | MVP Coordinating Centers; Cooperative Studies Program                                                           |  |  |  |  |  |  |  |  |  |  |  |  |  |
| Tim                                               | Assimes           |                              | M.D.                    | VA Palo Alto Health Care System       | Palo Alto, CA, USA                              | Co-Chair                                                       | MVP Publications and Presentations Committee                                                                    |  |  |  |  |  |  |  |  |  |  |  |  |  |
| Adriana                                           | Hung              |                              | M.D.                    | VA Tennessee Valley Healthcare Syst   | Nashville, TN, USA                              | Co-Chair; Local Site Inv                                       | MVP Publications and Presentations Committee; MVP Local Site Investigators                                      |  |  |  |  |  |  |  |  |  |  |  |  |  |
| Henry                                             | Kranzler          |                              | M.D.                    | Philadelphia VA Medical Center        | Philadelphia, PA, USA                           | Co-Chair                                                       | MVP Publications and Presentations Committee                                                                    |  |  |  |  |  |  |  |  |  |  |  |  |  |
| Samuel                                            | Aguayo            |                              | M.D.                    | Phoenix VA Health Care System         | Phoenix, AZ, USA                                | Local Site Investigator                                        | MVP Local Site Investigators                                                                                    |  |  |  |  |  |  |  |  |  |  |  |  |  |
| Sunil                                             | Ahuja             |                              | M.D.                    | South Texas Veterans Health Care Sy   | San Antonio, TX, USA                            | Local Site Investigator                                        | MVP Local Site Investigators                                                                                    |  |  |  |  |  |  |  |  |  |  |  |  |  |
| Kathrina                                          | Alexander         |                              | M.D.                    | Veterans Health Care System of the C  | Fayetteville, AR, USA                           | Local Site Investigator                                        | MVP Local Site Investigators                                                                                    |  |  |  |  |  |  |  |  |  |  |  |  |  |
| Xiao M.                                           | Androulakis       |                              | M.D.                    | Columbia VA Health Care System        | Columbia, SC, USA                               | Local Site Investigator                                        | MVP Local Site Investigators                                                                                    |  |  |  |  |  |  |  |  |  |  |  |  |  |
| Prakash                                           | Balasubramanian   |                              | M.D.                    | William S. Middleton Memorial Vete    | Madison, WI, USA                                | Local Site Investigator                                        | MVP Local Site Investigators                                                                                    |  |  |  |  |  |  |  |  |  |  |  |  |  |
| Zuhair                                            | Ballas            |                              | M.D.                    | Iowa City VA Health Care System       | Iowa City, IA, USA                              | Local Site Investigator                                        | MVP Local Site Investigators                                                                                    |  |  |  |  |  |  |  |  |  |  |  |  |  |
| Jean                                              | Beckham           |                              | Ph.D.                   | Durham VA Medical Center              | Durham, NC, USA                                 | Local Site Investigator                                        | MVP Local Site Investigators                                                                                    |  |  |  |  |  |  |  |  |  |  |  |  |  |
| Sujata                                            | Bhushan           |                              | M.D.                    | VA North Texas Health Care System     | Dallas, TX, USA                                 | Local Site Investigator                                        | MVP Local Site Investigators                                                                                    |  |  |  |  |  |  |  |  |  |  |  |  |  |
| Edward                                            | Boyko             |                              | M.D.                    | VA Puget Sound Health Care System     | Seattle, WA, USA                                | Local Site Investigator                                        | MVP Local Site Investigators                                                                                    |  |  |  |  |  |  |  |  |  |  |  |  |  |
| David                                             | Cohen             |                              | M.D.                    | Portland VA Medical Center            | Portland, OR, USA                               | Local Site Investigator                                        | MVP Local Site Investigators                                                                                    |  |  |  |  |  |  |  |  |  |  |  |  |  |
| Louis                                             | Dellitalia        |                              | M.D.                    | Birmingham VA Medical Center          | Birmingham, AL, USA                             | Local Site Investigator                                        | MVP Local Site Investigators                                                                                    |  |  |  |  |  |  |  |  |  |  |  |  |  |
| L. Christine                                      | Faulk             |                              | M.D.                    | Robert J. Dole VA Medical Center      | Wichita, KS, USA                                | Local Site Investigator                                        | MVP Local Site Investigators                                                                                    |  |  |  |  |  |  |  |  |  |  |  |  |  |
| Joseph                                            | Fayad             |                              | M.D.                    | VA Southern Nevada Healthcare Syst    | North Las Vegas, NV, USA                        | Local Site Investigator                                        | MVP Local Site Investigators                                                                                    |  |  |  |  |  |  |  |  |  |  |  |  |  |
| Daryl                                             | Fujii             |                              | Ph.D.                   | VA Pacific Islands Health Care System | Honolulu, HI, USA                               | Local Site Investigator                                        | MVP Local Site Investigators                                                                                    |  |  |  |  |  |  |  |  |  |  |  |  |  |
| Saib                                              | Gappy             |                              | M.D.                    | John D. Dingell VA Medical Center     | Detroit, MI, USA                                | Local Site Investigator                                        | MVP Local Site Investigators                                                                                    |  |  |  |  |  |  |  |  |  |  |  |  |  |
| Frank                                             | Gesek             |                              | Ph.D.                   | White River Junction VA Medical Cen   | White River Junction, VT, U                     | Local Site Investigator                                        | MVP Local Site Investigators                                                                                    |  |  |  |  |  |  |  |  |  |  |  |  |  |
| Jennifer                                          | Greco             |                              | M.D.                    | Sioux Falls VA Health Care System     | Sioux Falls, SD, USA                            | Local Site Investigator                                        | MVP Local Site Investigators                                                                                    |  |  |  |  |  |  |  |  |  |  |  |  |  |
| Michael                                           | Godschalk         |                              | M.D.                    | Richmond VA Medical Center            | Richmond, VA, USA                               | Local Site Investigator                                        | MVP Local Site Investigators                                                                                    |  |  |  |  |  |  |  |  |  |  |  |  |  |
| Todd W.                                           | Gress             |                              | M.D., Ph.D.             | Hershel "Woody" Williams VA Medic     | Huntington, WV, USA                             | Local Site Investigator                                        | MVP Local Site Investigators                                                                                    |  |  |  |  |  |  |  |  |  |  |  |  |  |
| Samir                                             | Gupta             |                              | M.D., M.S.              | VA San Diego Healthcare System        | San Diego, CA, USA                              | Local Site Investigator                                        | MVP Local Site Investigators                                                                                    |  |  |  |  |  |  |  |  |  |  |  |  |  |
| Salvador                                          | Gutierrez         |                              | M.D.                    | Edward Hines, Jr. VA Medical Center   | Hines, IL, USA                                  | Local Site Investigator                                        | MVP Local Site Investigators                                                                                    |  |  |  |  |  |  |  |  |  |  |  |  |  |
| John                                              | Harley            |                              | M.D., Ph.D.             | Cincinnati VA Medical Center          | Cincinnati, OH, USA                             | Local Site Investigator                                        | MVP Local Site Investigators                                                                                    |  |  |  |  |  |  |  |  |  |  |  |  |  |
| Mark                                              | Hamner            |                              | M.D.                    | Ralph H. Johnson VA Medical Center    | Charleston, SC, USA                             | Local Site Investigator                                        | MVP Local Site Investigators                                                                                    |  |  |  |  |  |  |  |  |  |  |  |  |  |
| Robin                                             | Hurley            |                              | M.D.                    | W.G. (Bill) Hefner VA Medical Center  | Salisbury, NC, USA                              | Local Site Investigator                                        | MVP Local Site Investigators                                                                                    |  |  |  |  |  |  |  |  |  |  |  |  |  |
| Pran                                              | Iruvanti          |                              | D.O., Ph.D.             | Hampton VA Medical Center             | Hampton, VA, USA                                | Local Site Investigator                                        | MVP Local Site Investigators                                                                                    |  |  |  |  |  |  |  |  |  |  |  |  |  |
| Frank                                             | Jacono            |                              | M.D.                    | VA Northeast Ohio Healthcare System   | Cleveland, OH, USA                              | Local Site Investigator                                        | MVP Local Site Investigators                                                                                    |  |  |  |  |  |  |  |  |  |  |  |  |  |

| *First Name and Middle Initial(s) | *Last Name    | *Suffix (eg, Jr, III) | Academic Degrees | Institution                               | Location (city, state/province, country) | Role or Contribution, eg, chair, principal investigator | Group (if more than 1 Group listed in the byline) and/or Subgroup (eg, Steering Committee) |  |  |  |  |  |  |  |  |  |  |  |  |  |
|-----------------------------------|---------------|-----------------------|------------------|-------------------------------------------|------------------------------------------|---------------------------------------------------------|--------------------------------------------------------------------------------------------|--|--|--|--|--|--|--|--|--|--|--|--|--|
| Darshana                          | Jhala         |                       | M.D.             | Philadelphia VA Medical Center            | Philadelphia, PA, USA                    | Local Site Investigator                                 | MVP Local Site Investigators                                                               |  |  |  |  |  |  |  |  |  |  |  |  |  |
| Scott                             | Kinlay        |                       | M.B.B.S., P      | VA Boston Healthcare System               | Boston, MA, USA                          | Local Site Investigator                                 | MVP Local Site Investigators                                                               |  |  |  |  |  |  |  |  |  |  |  |  |  |
| Michael                           | Landry        |                       | Ph.D.            | Southeast Louisiana Veterans Health       | New Orleans, LA, USA                     | Local Site Investigator                                 | MVP Local Site Investigators                                                               |  |  |  |  |  |  |  |  |  |  |  |  |  |
| Peter                             | Liang         |                       | M.D., M.P.       | VA New York Harbor Healthcare Syst        | New York, NY, USA                        | Local Site Investigator                                 | MVP Local Site Investigators                                                               |  |  |  |  |  |  |  |  |  |  |  |  |  |
| Suthat                            | Liangpunsakul |                       | M.D., M.P.       | Richard Roudebush VA Medical Cent         | Indianapolis, IN, USA                    | Local Site Investigator                                 | MVP Local Site Investigators                                                               |  |  |  |  |  |  |  |  |  |  |  |  |  |
| Jack                              | Lichy         |                       | M.D., Ph.D       | Washington DC VA Medical Center           | Washington, D. C., USA                   | Local Site Investigator                                 | MVP Local Site Investigators                                                               |  |  |  |  |  |  |  |  |  |  |  |  |  |
| C. Scott                          | Mahan         |                       | M.D.             | Charles George VA Medical Center          | Asheville, NC, USA                       | Local Site Investigator                                 | MVP Local Site Investigators                                                               |  |  |  |  |  |  |  |  |  |  |  |  |  |
| Ronnie                            | Marrache      |                       | M.D.             | VA Maine Healthcare System                | Augusta, ME, USA                         | Local Site Investigator                                 | MVP Local Site Investigators                                                               |  |  |  |  |  |  |  |  |  |  |  |  |  |
| Stephen                           | Mastorides    |                       | M.D.             | James A. Haley Veterans' Hospital         | Tampa, FL, USA                           | Local Site Investigator                                 | MVP Local Site Investigators                                                               |  |  |  |  |  |  |  |  |  |  |  |  |  |
| Kristin                           | Mattocks      |                       | Ph.D., M.P.      | Central Western Massachusetts Heal        | Leeds, MA, USA                           | Local Site Investigator                                 | MVP Local Site Investigators                                                               |  |  |  |  |  |  |  |  |  |  |  |  |  |
| Paul                              | Meyer         |                       | M.D., Ph.D       | Southern Arizona VA Health Care Sys       | Tucson, AZ, USA                          | Local Site Investigator                                 | MVP Local Site Investigators                                                               |  |  |  |  |  |  |  |  |  |  |  |  |  |
| Jonathan                          | Moorman       |                       | M.D., Ph.D       | James H. Quillen VA Medical Center        | Mountain Home, TN, USA                   | Local Site Investigator                                 | MVP Local Site Investigators                                                               |  |  |  |  |  |  |  |  |  |  |  |  |  |
| Timothy                           | Morgan        |                       | M.D.             | VA Long Beach Healthcare System           | Long Beach, CA, USA                      | Local Site Investigator                                 | MVP Local Site Investigators                                                               |  |  |  |  |  |  |  |  |  |  |  |  |  |
| Maureen                           | Murdoch       |                       | M.D., M.P.       | Minneapolis VA Health Care System         | Minneapolis, MN, USA                     | Local Site Investigator                                 | MVP Local Site Investigators                                                               |  |  |  |  |  |  |  |  |  |  |  |  |  |
| James                             | Norton        |                       | Ph.D.            | VA Health Care Upstate New York           | Albany, NY, USA                          | Local Site Investigator                                 | MVP Local Site Investigators                                                               |  |  |  |  |  |  |  |  |  |  |  |  |  |
| Olaoluwa                          | Okusaga       |                       | M.D.             | Michael E. DeBakey VA Medical Cent        | Houston, TX, USA                         | Local Site Investigator                                 | MVP Local Site Investigators                                                               |  |  |  |  |  |  |  |  |  |  |  |  |  |
| Kris Ann                          | Oursler       |                       | M.D.             | Salem VA Medical Center                   | Salem, VA, USA                           | Local Site Investigator                                 | MVP Local Site Investigators                                                               |  |  |  |  |  |  |  |  |  |  |  |  |  |
| Samuel                            | Poon          |                       | M.D.             | Manchester VA Medical Center              | Manchester, NH, USA                      | Local Site Investigator                                 | MVP Local Site Investigators                                                               |  |  |  |  |  |  |  |  |  |  |  |  |  |
| Michael                           | Rauchman      |                       | M.D.             | St. Louis VA Health Care System           | St. Louis, MO, USA                       | Local Site Investigator                                 | MVP Local Site Investigators                                                               |  |  |  |  |  |  |  |  |  |  |  |  |  |
| Richard                           | Servatius     |                       | Ph.D.            | Syracuse VA Medical Center                | Syracuse, NY, USA                        | Local Site Investigator                                 | MVP Local Site Investigators                                                               |  |  |  |  |  |  |  |  |  |  |  |  |  |
| Satish                            | Sharma        |                       | M.D.             | Providence VA Medical Center              | Providence, RI, USA                      | Local Site Investigator                                 | MVP Local Site Investigators                                                               |  |  |  |  |  |  |  |  |  |  |  |  |  |
| River                             | Smith         |                       | Ph.D.            | Eastern Oklahoma VA Health Care Sy        | Muskogee, OK, USA                        | Local Site Investigator                                 | MVP Local Site Investigators                                                               |  |  |  |  |  |  |  |  |  |  |  |  |  |
| Peruvemba                         | Sriram        |                       | M.D.             | N. FL/S. GA Veterans Health System        | Gainesville, FL, USA                     | Local Site Investigator                                 | MVP Local Site Investigators                                                               |  |  |  |  |  |  |  |  |  |  |  |  |  |
| Patrick                           | Strollo       | Jr.                   | M.D.             | VA Pittsburgh Health Care System          | Pittsburgh, PA, USA                      | Local Site Investigator                                 | MVP Local Site Investigators                                                               |  |  |  |  |  |  |  |  |  |  |  |  |  |
| Neeraj                            | Tandon        |                       | M.D.             | Overton Brooks VA Medical Center          | Shreveport, LA, USA                      | Local Site Investigator                                 | MVP Local Site Investigators                                                               |  |  |  |  |  |  |  |  |  |  |  |  |  |
| Gerardo                           | Villareal     |                       | M.D.             | New Mexico VA Health Care System          | Albuquerque, NM, USA                     | Local Site Investigator                                 | MVP Local Site Investigators                                                               |  |  |  |  |  |  |  |  |  |  |  |  |  |
| Jessica                           | Walsh         |                       | M.D.             | VA Salt Lake City Health Care System      | Salt Lake City, UT, USA                  | Local Site Investigator                                 | MVP Local Site Investigators                                                               |  |  |  |  |  |  |  |  |  |  |  |  |  |
| John                              | Wells         |                       | Ph.D.            | Edith Nourse Rogers Memorial Veter        | Bedford, MA, USA                         | Local Site Investigator                                 | MVP Local Site Investigators                                                               |  |  |  |  |  |  |  |  |  |  |  |  |  |
| Jeffrey                           | Whittle       |                       | M.D., M.P.       | Clement J. Zablocki VA Medical Cent       | Milwaukee, WI, USA                       | Local Site Investigator                                 | MVP Local Site Investigators                                                               |  |  |  |  |  |  |  |  |  |  |  |  |  |
| Mary                              | Whooley       |                       | M.D.             | San Francisco VA Health Care System       | San Francisco, CA, USA                   | Local Site Investigator                                 | MVP Local Site Investigators                                                               |  |  |  |  |  |  |  |  |  |  |  |  |  |
| Peter                             | Wilson        |                       | M.D.             | Atlanta VA Medical Center                 | Decatur, GA, USA                         | Local Site Investigator                                 | MVP Local Site Investigators                                                               |  |  |  |  |  |  |  |  |  |  |  |  |  |
| Junzhe                            | Xu            |                       | M.D.             | VA Western New York Healthcare Sys        | Buffalo, NY, USA                         | Local Site Investigator                                 | MVP Local Site Investigators                                                               |  |  |  |  |  |  |  |  |  |  |  |  |  |
| Shing Shing                       | Yeh           |                       | Ph.D., M.D       | Northport VA Medical Center               | Northport, NY, USA                       | Local Site Investigator                                 | MVP Local Site Investigators                                                               |  |  |  |  |  |  |  |  |  |  |  |  |  |
| Elizabeth S.                      | Bast          |                       | M.D., M.P.H.     | Miami VA Health Care System               | Miami, FL, USA                           | Local Site Investigator                                 | MVP Local Site Investigators                                                               |  |  |  |  |  |  |  |  |  |  |  |  |  |
| Gerald Wayne                      | Dryden        | Jr.                   | M.D., Ph.D.      | Louisville VA Medical Center              | Louisville, KY, USA                      | Local Site Investigator                                 | MVP Local Site Investigators                                                               |  |  |  |  |  |  |  |  |  |  |  |  |  |
| Daniel J.                         | Hogan         |                       | M.D.             | Bay Pines VA Healthcare System            | Bay Pines, FL, USA                       | Local Site Investigator                                 | MVP Local Site Investigators                                                               |  |  |  |  |  |  |  |  |  |  |  |  |  |
| Seema                             | Joshi         |                       | M.D.             | VA Eastern Kansas Health Care System      | Leavenworth, KS , USA                    | Local Site Investigator                                 | MVP Local Site Investigators                                                               |  |  |  |  |  |  |  |  |  |  |  |  |  |
| Tze Shien                         | Lo            |                       | M.D.             | Fargo VA Health Care System               | Fargo, ND, USA                           | Local Site Investigator                                 | MVP Local Site Investigators                                                               |  |  |  |  |  |  |  |  |  |  |  |  |  |
| Providencia                       | Morales       |                       | R.N.             | Northern Arizona VA Health Care System    | Prescott, AZ                             | Local Site Investigator                                 | MVP Local Site Investigators                                                               |  |  |  |  |  |  |  |  |  |  |  |  |  |
| Eknath                            | Naik          |                       | M.D., Ph.D.      | West Palm Beach VA Medical Center         | West Palm Beach, FL, USA                 | Local Site Investigator                                 | MVP Local Site Investigators                                                               |  |  |  |  |  |  |  |  |  |  |  |  |  |
| Michael K.                        | Ong           |                       | M.D.             | VA Greater Los Angeles Health Care System | Los Angeles, CA, USA                     | Local Site Investigator                                 | MVP Local Site Investigators                                                               |  |  |  |  |  |  |  |  |  |  |  |  |  |
| Ismene                            | Petrakis      |                       | M.D.             | VA Connecticut Healthcare System          | West Haven, CT, USA                      | Local Site Investigator                                 | MVP Local Site Investigators                                                               |  |  |  |  |  |  |  |  |  |  |  |  |  |
| Amneet S.                         | Rai           |                       | Pharm.D.         | VA Sierra Nevada Health Care System       | Reno, NV, USA                            | Local Site Investigator                                 | MVP Local Site Investigators                                                               |  |  |  |  |  |  |  |  |  |  |  |  |  |

Supplemental Online Content: Nonauthor Collaborators

\*First name, last name, and suffix (if applicable) are required and will appear in PubMed.

| *First Name and Middle Initial(s) | *Last Name | *Suffix (eg, Jr, III) | Academic Degrees | Institution                               | Location (city, state/province, country) | Role or Contribution, eg, chair, principal investigator | Group (if more than 1 Group listed in the byline) and/or Subgroup (eg, Steering Committee) |  |  |  |  |  |  |  |  |  |  |
|-----------------------------------|------------|-----------------------|------------------|-------------------------------------------|------------------------------------------|---------------------------------------------------------|--------------------------------------------------------------------------------------------|--|--|--|--|--|--|--|--|--|--|
| Andrew W.                         | Yen        |                       | M.D.             | VA Northern California Health Care System | Mather, CA, USA                          | Local Site Investigator                                 | MVP Local Site Investigators                                                               |  |  |  |  |  |  |  |  |  |  |
