# Supplementary material for: GLP1R Gene Expression and Kidney Disease Progression
Source: PubMed Central journal article supplement (PMC11581634; doi:10.1001/jamanetworkopen.2024.40286), 2024-10-25
Supplement: jamanetwopen-e2440286-s003.pdf [file jamanetwopen-e2440286-s003.pdf]

## Data Sharing Statement

Triozzi. GLP1R Gene Expression and Kidney Disease Progression. *JAMA Netw Open*.  
Published October 25, 2024. doi:10.1001/jamanetworkopen.2024.40286

### Data

**Data available:** No

### Additional Information

**Explanation for why data not available:** All genetic instruments are provided in the supplemental materials. The GTEx Portal is available from <https://gtexportal.org/>. The VA MVP individual level data will not be shared through dbGAP; the Office of Research and Development of the Department of Veterans Affairs needs to be contacted for access requests for that data.
